# Supplementary material
Source: publisher figshare collection journal article supplement (https://tandf.figshare.com/articles/dataset/_/8046359)
Supplement: Supplementary file 2 [file 1]

Archive with 4 entries (4 files):
- tams_a_1576541_sm8652.pdf
- tams_a_1576541_sm3686.pdf
- tams_a_1576541_sm3681.pdf
- tams_a_1576541_sm3590.pdf
