# Supplementary material
Source: publisher figshare collection journal article supplement (https://tandf.figshare.com/articles/dataset/_/8046359)
Supplement: Supplementary file 2 [file 1 › tams_a_1576541_sm3686.pdf]

[illegible]
