# Supplementary material
Source: publisher figshare collection journal article supplement (https://tandf.figshare.com/articles/dataset/_/8046359)
Supplement: Supplementary file 2 [file 1 › tams_a_1576541_sm8652.pdf]

## Supplementary Information 2

### Genomic resources for the spotted ragged-tooth shark *Carcharias taurus*

JD Klein, AE Bester-van der Merwe, ML Dicken, A Emami-Khoyi, KL Mmonwa and PR Teske

*African Journal of Marine Science* 41(1)

<https://doi.org/10.2989/1814232X.2019.1576541>

### Microsatellite-marker amplification

Selected microsatellite primers were modified by adding an M13 sequence (TGTAACGACGCGCCAGT) to the forward primer for amplification, using the three-primer amplification protocol of Schuelke (2000), and by adding a PIG-tail (GTTT; Brownstein et al. 1996) to the reverse primer. Each 10- $\mu$ l PCR reaction contained 5  $\mu$ l of KAPA2G Fast Multiplex Mix (containing KAPA2G Fast HotStart DNA Polymerase, PCR Buffer, 3 mM MgCl<sub>2</sub>, and 200  $\mu$ M of each dNTP), 2  $\mu$ l of H<sub>2</sub>O, 0.5  $\mu$ l of forward primer (1 pmol/ $\mu$ l), 1  $\mu$ l of reverse primer (2 pmol/ $\mu$ l), 1  $\mu$ l of fluorescently labelled (NED/VIC/FAM/PET) M13 primer (2 pmol/ $\mu$ l), and 0.5  $\mu$ l of template DNA (50 ng/ $\mu$ l).

### Thermocycling conditions

**Protocol 1:** Ctaur3, Ctaur4, Ctaur10, Ctaur11, Ctaur21 and Ctaur22

94 °C for 3 min, five 3-step cycles at 94 °C for 30 sec, 60 °C to 52 °C for 20 sec in 2 °C steps per cycle, 72 °C for 30 sec, followed by 35 3-step cycles at 94 °C for 30 sec, 52 °C for 20 sec, 72 °C for 30 sec, and a final extension at 72 °C for 10 min.

**Ctaur2:** Same as Protocol 1 (above) except annealing and extension time were increased to 30 sec and 45 sec, respectively.

**Protocol 2:** Ctaur20 and Ctaur24

94 °C for 3 min, four 3-step cycles at 94 °C for 30 sec, 60 °C to 52 °C for 20 sec in 2 °C steps per cycle, 72 °C for 10 sec, followed by 25 3-step cycles at 94 °C for 30 sec, 55 °C for 20 sec, 72 °C for 10 sec, and a final extension at 72 °C for 5 min.

**Ctaur26:** Same as Protocol 2 (above) except final extension time was increased to 45 min.

**Protocol 3:** Ctaur19

94 °C for 3 min, four 3-step cycles at 94 °C for 20 sec, 60 °C to 52 °C for 15 sec in 2 °C steps per cycle, 72 °C for 10 sec, followed by 25 3-step cycles at 94 °C for 30 sec, 57 °C for 20 sec, 72 °C for 15 sec, and a final extension at 72 °C for 15 min.

### Mitogenome assembly

An initial assembly was performed using Mira 4.9.6 (Chevreux et al. 2004) and MITOBIM 1.8 (Hahn et al. 2013) with the previously published mitogenome (GenBank Accession number: KF569943.1; Chang et al. 2015) of the species as the initial bait template. The sequence was annotated with the web-based tool MitoAnnotator (Iwasaki et al. 2013).

**Table S1:** Single nucleotide polymorphisms (SNPs) found in 16 gene regions of the mitogenome of spotted ragged-tooth shark *Carcharias taurus* specimens from South Africa, Australia and the United Arab Emirates. ATP = adenosine triphosphate; CO = cytochrome c oxidase subunit; cytb = cytochrome *b*; NADH = nicotinamide adenine dehydrogenase subunit; rRNA = ribosomal ribonucleic acid

| Gene           | Length (bp) | SNPs | Relative variation (%) |
|----------------|-------------|------|------------------------|
| CO1            | 1 553       | 8    | 0.515                  |
| CO2            | 690         | 2    | 0.290                  |
| CO3            | 785         | 1    | 0.127                  |
| NADH1          | 974         | 7    | 0.719                  |
| NADH2          | 1 042       | 9    | 0.864                  |
| NADH3          | 348         | 2    | 0.575                  |
| NADH4L         | 296         | 2    | 0.676                  |
| NADH4          | 1 380       | 11   | 0.797                  |
| NADH5          | 1 829       | 15   | 0.820                  |
| NADH6          | 521         | 5    | 0.960                  |
| Cytb           | 1 144       | 11   | 0.962                  |
| 12S rRNA       | 949         | 2    | 0.211                  |
| 16S rRNA       | 1 669       | 8    | 0.479                  |
| ATP6           | 683         | 4    | 0.586                  |
| ATP8           | 171         | 1    | 0.585                  |
| Control region | 1 058       | 7    | 0.662                  |

## References

- Brownstein MJ, Carpten JD, Smith JR. 1996. Modulation of non-templated nucleotide addition by TaqDNA polymerase: primer modifications that facilitate genotyping. *Biotechniques* 20: 1004–1006.
- Chang CH, Jabado RW, Lin YS, Shao KT. 2015. The complete mitochondrial genome of the sand tiger shark, *Carcharias taurus* (Chondrichthyes, Odontaspidae). *Mitochondrial DNA* 26: 728–729.
- Chevreur B, Pfisterer T, Drescher B, Driesel AJ, Müller WEG, Wetter T, Suhai S. 2004. Using the miraEST assembler for reliable and automated mRNA transcript assembly and SNP detection in sequenced ESTs. *Genome Research* 14: 1147–1159.
- Hahn C, Bachmann L, Chevreur B. 2013. Reconstructing mitochondrial genomes directly from genomic next-generation sequencing reads – a baiting and iterative mapping approach. *Nucleic Acids Research* 41: e129–e129.
- Iwasaki W, Fukunaga T, Isagozawa R, Yamada K, Maeda Y, Satoh TP et al. 2013. Mitofish and mitoannotator: a mitochondrial genome database of fish with an accurate and automatic annotation pipeline. *Molecular Biology and Evolution* 30: 2531–2540.
- Schuelke M. 2000. An economic method for the fluorescent labeling of PCR fragments. *Nature Biotechnology* 18: 233–234.
